# Supplementary material
Source: PubMed Central journal article supplement (PMC4762034)

**Supplementary Table 1. Procedure codes used for case identification.** Adapted from Ananthakrishnan AN, McGinley EL, Binion DG, *et al.*<sup>20</sup>

| <b>Description</b>                                   | <b>ICD-9-CM codes</b>                                                                                                                                                       |
|------------------------------------------------------|-----------------------------------------------------------------------------------------------------------------------------------------------------------------------------|
| Endoscopic Procedures                                | 45.1x, 45.2x, 45.3x, 45.4x, 45.52, 46.86                                                                                                                                    |
| Incision, Excision and Anastomosis of the Intestines | 45.0x, 45.33, 45.5, 45.50, 45.51, 45.6, 45.61, 45.62, 45.63, 45.9, 45.90, 45.91, 45.93, 45.94                                                                               |
| Resection of the Large Intestine                     | 45.7x, 45.8, 45.81, 45.82, 45.83, 45.92, 45.93, 45.94, 45.95                                                                                                                |
| Rectal and Perirectal Surgery                        | 48, 48.0, 48.1, 48.2x, 48.3x, 48.4, 48.40, 48.41, 48.42, 48.43, 48.49, 48.5, 48.50, 48.51, 48.52, 48.59, 48.6x, 48.7x, 48.8, 48.81, 48.82, 48.9, 48.91, 48.92, 48.93, 48.99 |
| Other Surgery of the Small Intestine                 | 46.0, 46.01, 46.02, 46.20, 46.21, 46.22, 46.23, 46.24, 46.4, 46.40, 46.41, 46.5, 46.50, 46.51, 46.6, 46.60, 46.61, 46.62, 46.71, 46.72, 46.73, 46.74, 46.81, 46.95          |
| Other Surgery of the Large Intestine                 | 46.03, 46.04, 46.10, 46.11, 46.13, 46.14, 46.1, 46.42, 46.43, 46.52, 46.63, 46.64, 46.75, 46.76, 46.79, 46.82, 46.87, 46.91, 46.92, 46.96                                   |
| Other Intestinal Surgery, unspecified site           | 46.7, 46.8, 46.80, 46.85, 46.9                                                                                                                                              |

**Supplementary Table 2. Univariate analysis of trends using negative binomial regression.** Weights used are equal to the inverse of the standard error terms obtained from annual estimations of hospitalization rates.

| <b>Trend</b>               | <b>Weighted Annual Incidence Rate Ratios (95% CI)</b> | <b>P value</b> |
|----------------------------|-------------------------------------------------------|----------------|
| Total NIS                  | 0.97 (0.97 – 0.98)                                    | <0.001         |
| IBD, 1-17 yo               | 1.04 (1.03 – 1.05)                                    | <0.001         |
| Length of stay             | 0.98 (0.98 – 0.99)                                    | <0.001         |
| With Surgery               | 1.03 (1.02 – 1.04)                                    | <0.001         |
| Without Surgery            | 1.04 (1.03 – 1.05)                                    | <0.001         |
| Without Procedures         | 1.04 (1.02 – 1.05)                                    | <0.001         |
| Endoscopy only             | 1.01 (1.00 – 1.02)                                    | 0.017          |
| Hospital days, 1988 - 2011 | 1.01 (1.00 – 1.03)                                    | 0.004          |
| Hospital Days, 1988 – 1995 | 0.94 (0.90 – 0.98)                                    | 0.003          |
| Hospital Days, 1996 – 2011 | 1.04 (1.02 – 1.05)                                    | <0.001         |

Supplementary Figure 1. Trends in hospitalizations excluding shorter lengths of stay ( $\leq 1$  day). *P* for trend < 0.001.

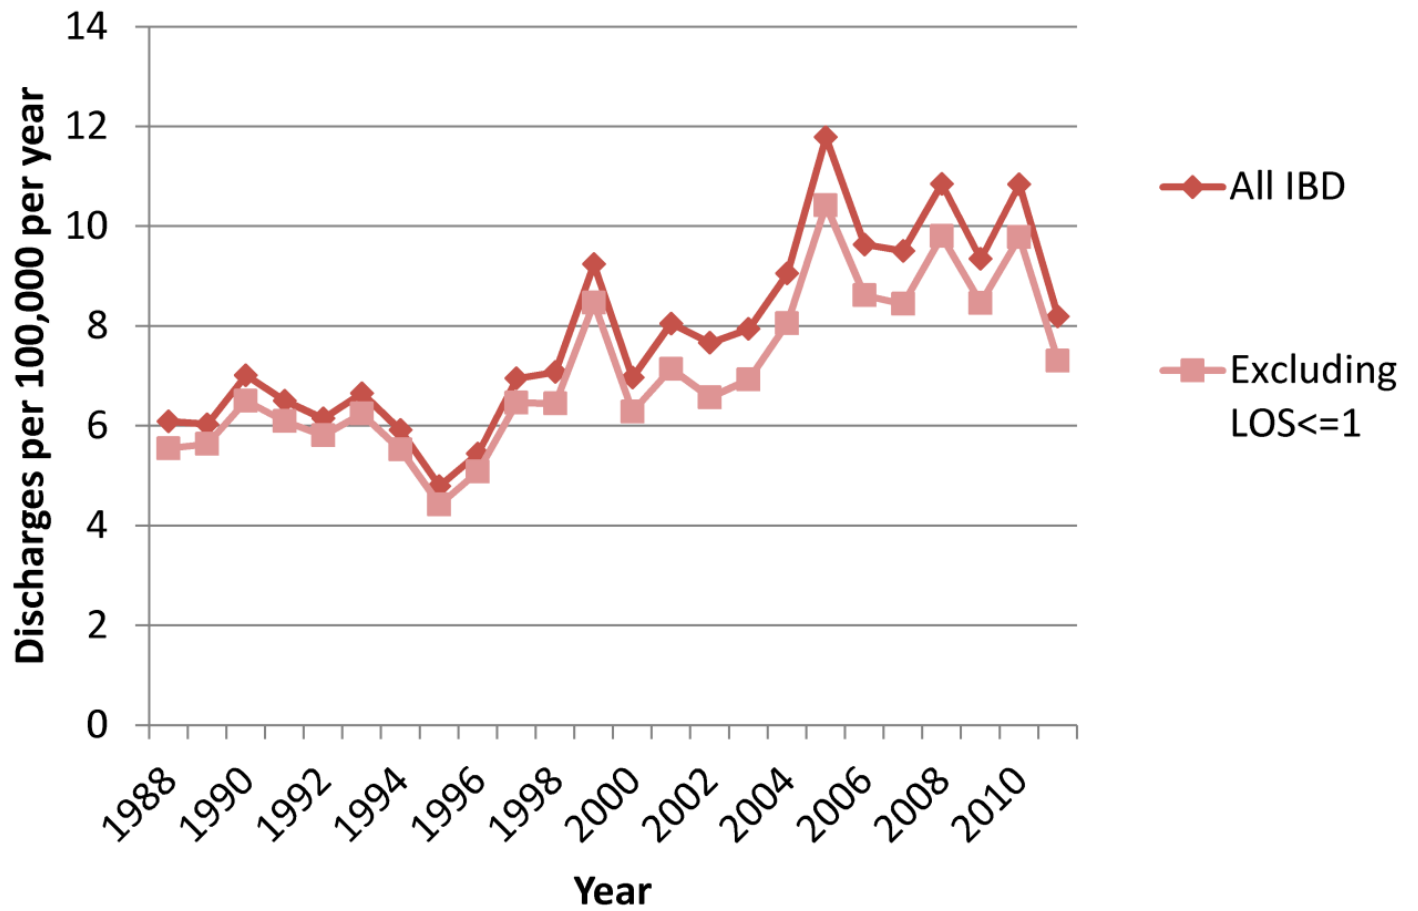

Supplement: NIHMS710000-supplement-Supplementary.pdf [file NIHMS710000-supplement-Supplementary.pdf]
